# Supplementary material for: Impact of oxygen vacancies on TiO2 charge carrier transfer for photoelectrochemical water splitting
Source: Royal Society of Chemistry journal article supplement (doi:10.1039/c9dt04374h), 2020-01-01
Supplement: c9dt04374h1.pdf [file c9dt04374h1.pdf]

Supporting Information for

**Impact of Oxygen Vacancies on TiO<sub>2</sub> Charge Carrier Transfer for  
Photoelectrochemical Water Splitting**

Xiaoqian Huang, Xiaoru Gao, Qihui Xue, Can Wang, Ruikang Zhang,\* Yuanzhe Gao\* and  
Zhangang Han

*National Demonstration Center for Experimental Chemistry Education, Hebei Key Laboratory of  
Organic Functional Molecules, College of Chemistry and Material Science, Hebei Normal  
University, Shijiazhuang, Hebei 050024, People's Republic of China*

E-mail: zhangruikang@hebtu.edu.cn (R. Zhang); E-mail: yzgao2003@126.com (Y. Gao)

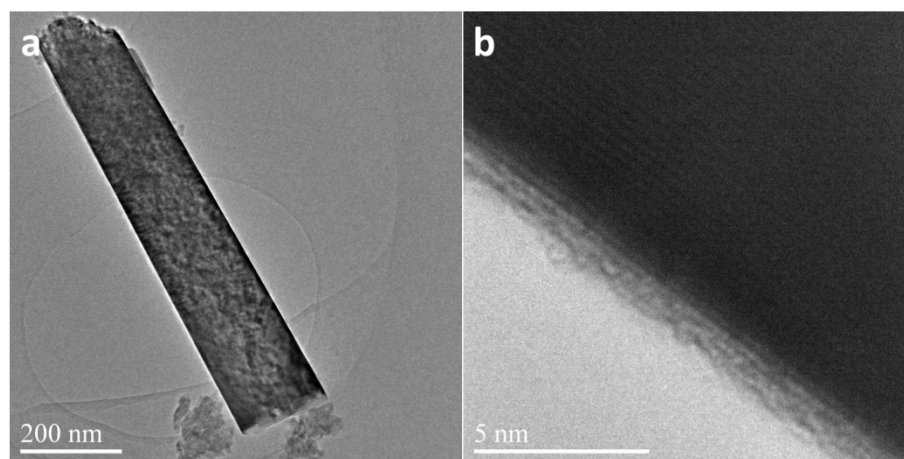

**Figure S1** TEM images of pristine TiO<sub>2</sub> with a (a) low and (b) high magnification.

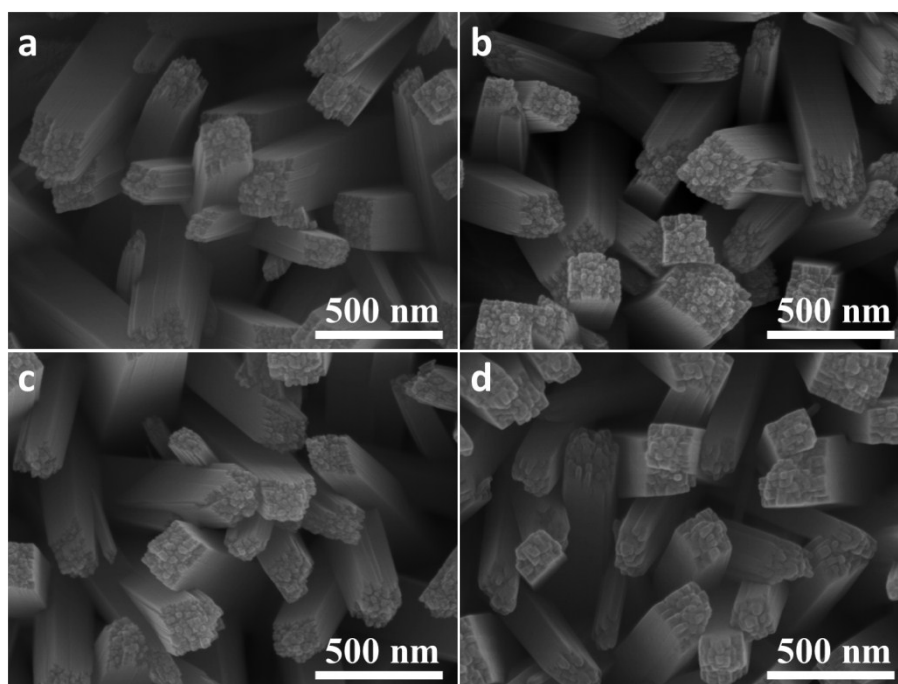

**Figure S2** SEM images of (a) TiO<sub>2</sub>-300, (b) TiO<sub>2</sub>-400, (c) TiO<sub>2</sub>-500 and (d) TiO<sub>2</sub>-600 photoanodes, respectively.

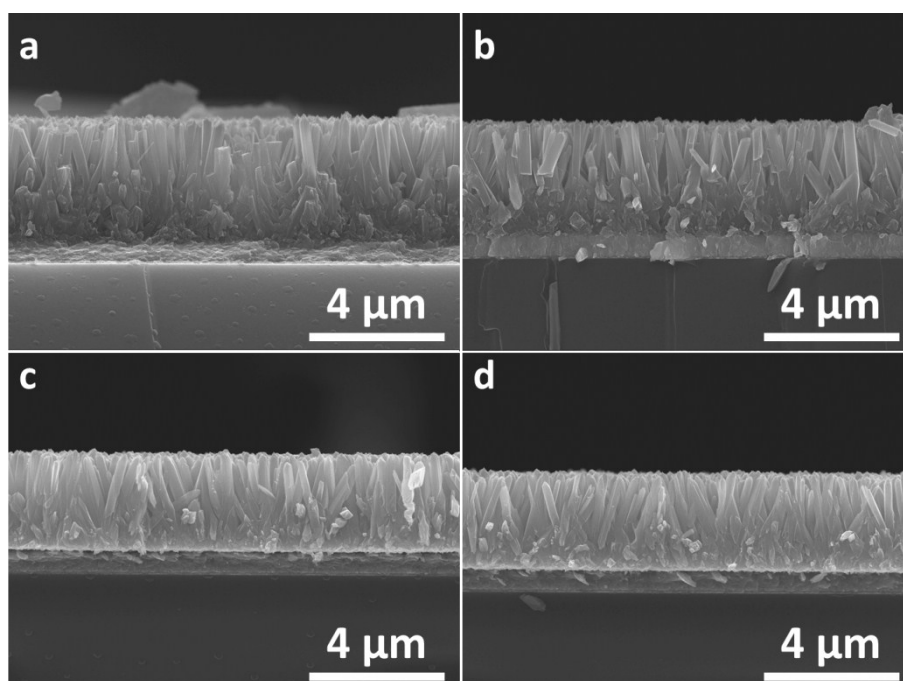

**Figure S3** SEM images of (a) TiO<sub>2</sub>-300, (b) TiO<sub>2</sub>-400, (c) TiO<sub>2</sub>-500 and (d) TiO<sub>2</sub>-600 photoanodes in side view.

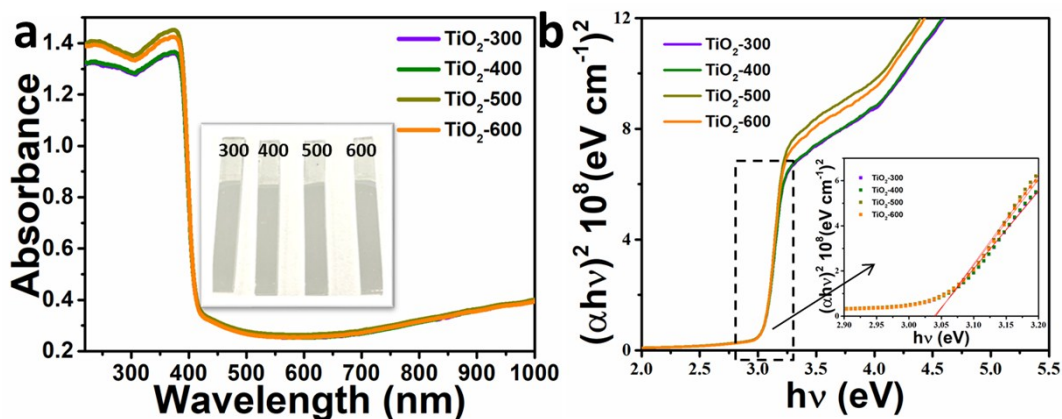

**Figure S4** (a) UV-vis diffuse-reflectance spectra and (b) band gap energy of TiO<sub>2</sub>-300, TiO<sub>2</sub>-400, TiO<sub>2</sub>-500 and TiO<sub>2</sub>-600 photoanodes, respectively.

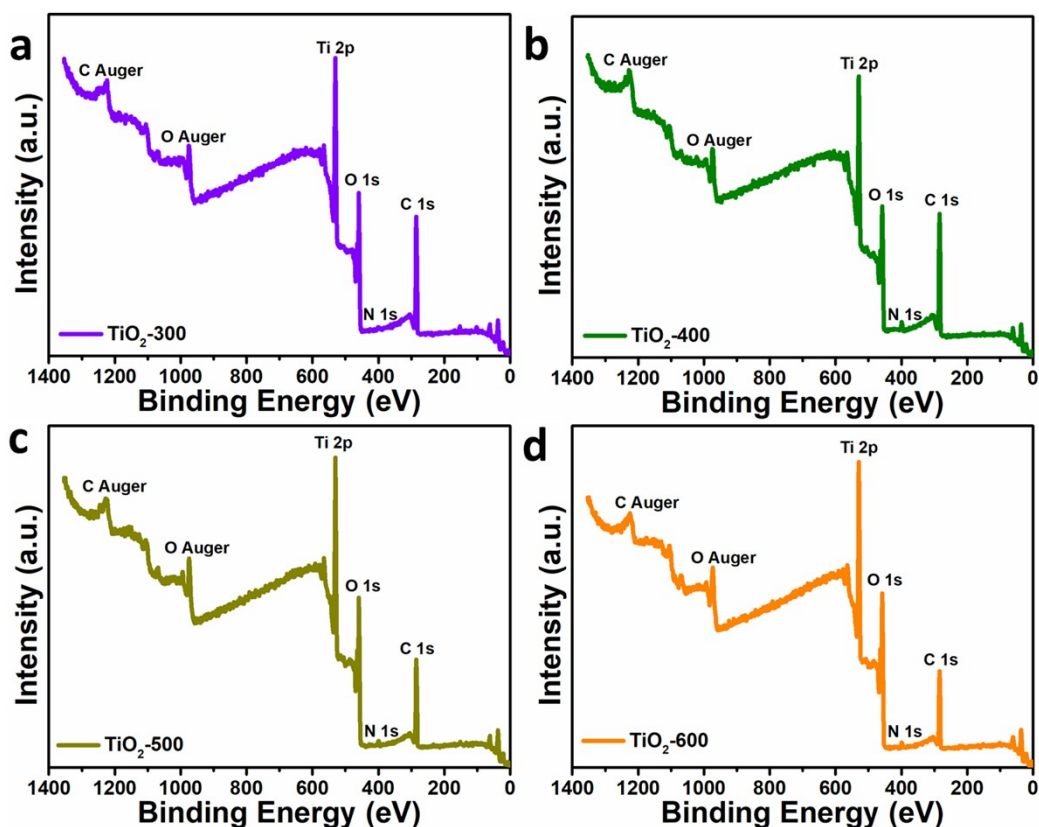

**Figure S5** The full XPS spectra of (a) TiO<sub>2</sub>-300, (b) TiO<sub>2</sub>-400, (c) TiO<sub>2</sub>-500 and (d) TiO<sub>2</sub>-600 photoanodes, respectively.

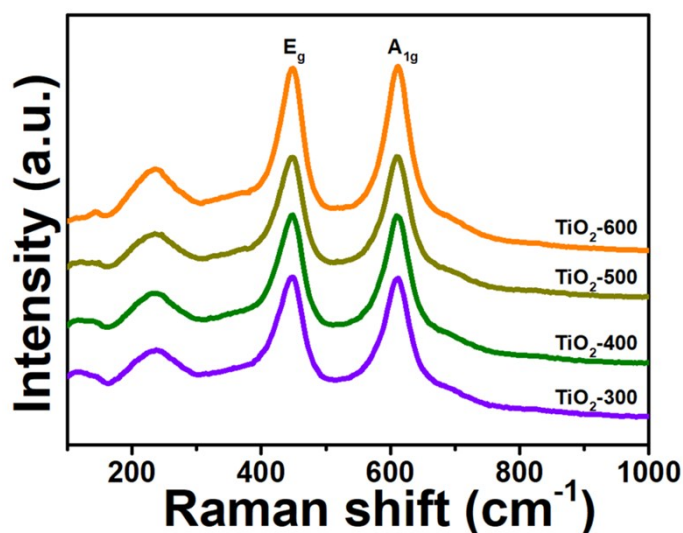

**Figure S6** Raman spectra of TiO<sub>2</sub>-300, TiO<sub>2</sub>-400, TiO<sub>2</sub>-500 and TiO<sub>2</sub>-600 photoanodes.

**Table S1** Comparison studies for various TiO<sub>2</sub> photoanodes and their PEC performances.

| Samples                   | Applied bias         | Electrolyte                           | $J$ (mA cm <sup>-2</sup> ) | References |
|---------------------------|----------------------|---------------------------------------|----------------------------|------------|
| TiO <sub>2</sub> fiber    | 1.23 V vs. RHE       | 1 M NaOH                              | ~0.18                      | 10         |
| TiO <sub>2</sub> nanorod  | 0.5 V vs.<br>Ag/AgCl | 1 M NaOH                              | ~0.82                      | 11         |
| TiO <sub>2</sub> nanotube | 0.6 V vs.<br>Ag/AgCl | 1 M NaOH                              | ~0.5                       | 13         |
| Anatase TiO <sub>2</sub>  | 0.6 V vs.<br>Ag/AgCl | KOH with 10%<br>Methanol              | ~1.02                      | 38         |
| Branched TiO <sub>2</sub> | 1.23 V vs. RHE       | 0.1 M NaOH                            | ~1.29                      | 39         |
| Ni/TiO <sub>2</sub>       | 0.6 vs. Ag/AgCl      | 1M KOH                                | ~0.16                      | 40         |
| TiO <sub>2</sub> -400     | 1.23 V vs. RHE       | 0.5 M Na <sub>2</sub> SO <sub>4</sub> | ~1.23                      | This work  |

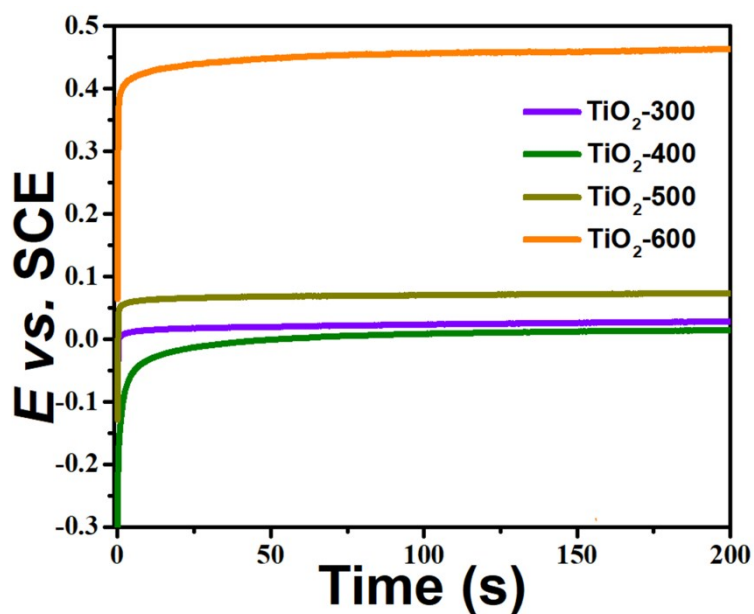

**Figure S7** The measured Galvanostatic-Time curves at 0.2 mA cm<sup>-2</sup> for TiO<sub>2</sub>-300, TiO<sub>2</sub>-400, TiO<sub>2</sub>-500 and TiO<sub>2</sub>-600 photoanodes, respectively.

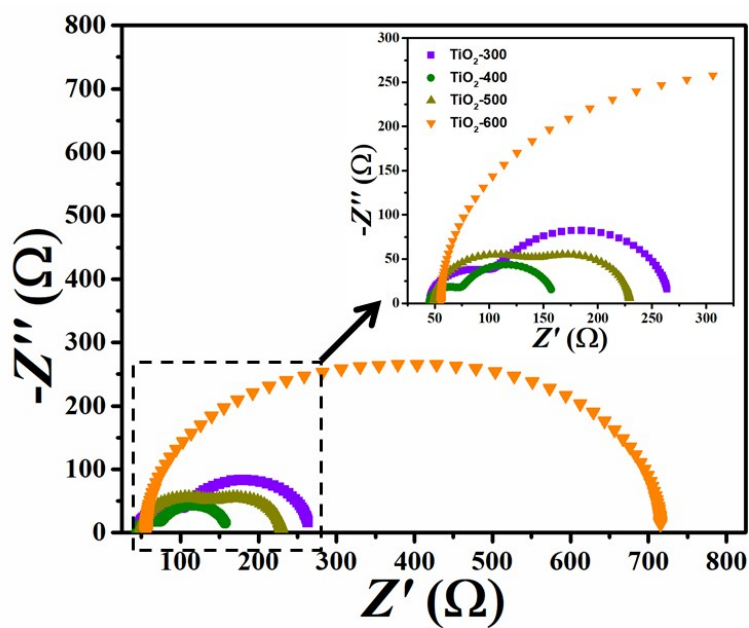

**Figure S8** The fitting Nyquist plots of TiO<sub>2</sub>-300, TiO<sub>2</sub>-400, TiO<sub>2</sub>-500 and TiO<sub>2</sub>-600 photoanodes under illumination.

**Table S2** Fitting EIS results of four TiO<sub>2</sub> photoanodes at  $J= 0.2 \text{ mA cm}^{-2}$  under illumination.

| pH= 7                | TiO <sub>2</sub> -300 | TiO <sub>2</sub> -400 | TiO <sub>2</sub> -500 | TiO <sub>2</sub> -600 |
|----------------------|-----------------------|-----------------------|-----------------------|-----------------------|
| $R_1$ (ohm)          | 60                    | 30                    | 90                    | 310                   |
| $C_1$ ( $10^{-4}$ F) | 0.12                  | 0.35                  | 0.10                  | 0.04                  |
| $R_2$ (ohm)          | 160                   | 85                    | 90                    | 350                   |
| $C_2$ ( $10^{-4}$ F) | 1.0                   | 3.5                   | 1.0                   | 0.14                  |

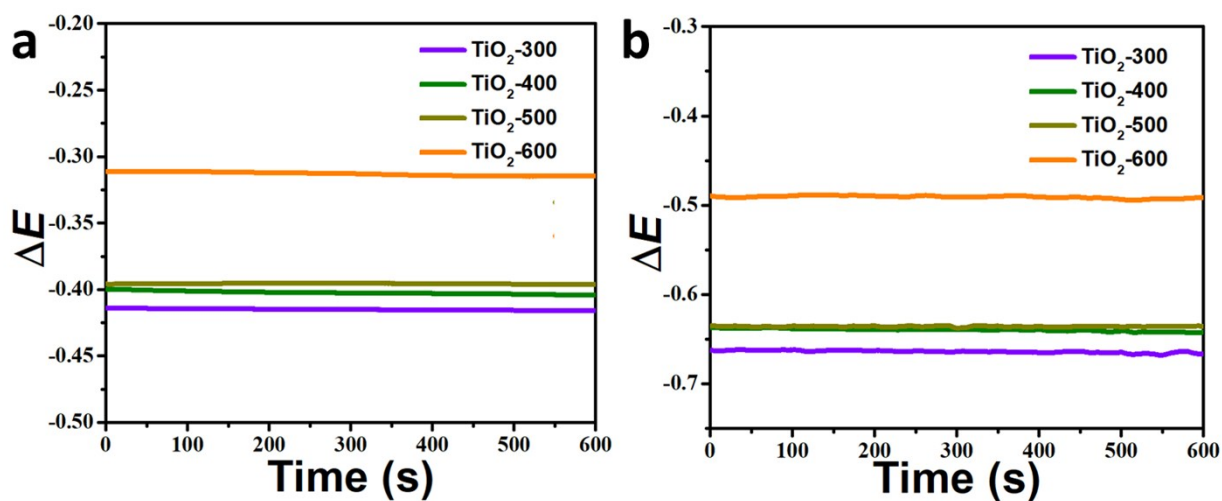

**Figure S9** The measured open-circuit voltage of TiO<sub>2</sub>-300, TiO<sub>2</sub>-400, TiO<sub>2</sub>-500 and TiO<sub>2</sub>-600 photoanodes in (a) dark and in (b) light condition.
